# Supplementary material
Source: bioRxiv or medRxiv preprint supplement (https://www.biorxiv.org/highwire/filestream/103590/field_highwire_adjunct_files/2/209874-3.pdf)
Supplement: Supplementary file [file 209874-3.pdf]

Table S4. Aerial symptom scoring scale

| <b>Leaf symptoms</b>                                                     | <b>Score</b> | <b>Shoot symptoms</b>                                    |
|--------------------------------------------------------------------------|--------------|----------------------------------------------------------|
| Asymptomatic                                                             | <b>0</b>     | Asymptomatic                                             |
| Specks of chlorosis localized to a small section of leaf                 | <b>1</b>     | Punctate brown streaks localized to small length of stem |
| Widespread chlorosis throughout leaves                                   | <b>2</b>     | Spreading brown streaks along less than 10% of the stem  |
| Widespread chlorosis accompanied by slight die-back of terminal branches | <b>3</b>     | Brown streaking along 10-60% of stem                     |
| Widespread chlorosis and plant die-back                                  | <b>4</b>     | Continuous brown streaking along the entire stem length  |
